# Supplementary material for: Development and testing of an objective structured clinical exam (OSCE) to assess socio-cultural dimensions of patient safety competency
Source: PubMed Central journal article supplement — BMJ Qual Saf. 2014 Nov 14;24(3):188–94. doi: 10.1136/bmjqs-2014-003277 (PMC4345888; doi:10.1136/bmjqs-2014-003277), 2014-11-14
Supplement: bmjqs-2014-003277-s1.pdf [file bmjqs-2014-003277-s1.pdf]

### Station Example - Supplemental On-line Only Appendix

This supplemental appendix provides a high-level breakdown of one of the four stations to show how the case was developed to assess four competency domains. We provide a summary of the key aspects of the case and links to the specific domains assessed in this station.

**Station Purpose.** To assess communication, risk assessment, safety culture and teamwork skills required to optimize safe patient care in the context of a complex discharge and interdisciplinary conflict

**Case Overview.** The student instructions explain the student has just come from interdisciplinary rounds on a stroke rehab floor in an acute care setting in which the student presented an update on a 78-year medically stable female (Bertha Waller) who suffered a stroke three weeks earlier (The student’s supervisor had been called away). Mrs. Waller lives alone, has right-sided weakness and some short-term memory problems as a result of the stroke but is progressing well with therapy. At the close of rounds the plan is for discharge in 5-7 days. However, after rounds the student is told that, due to “pressure on inpatient beds”, Mrs. Waller needs to be discharged tomorrow instead of next week. This student is looking after Mrs. Waller today and has to share this information with her. The student is instructed to enter Mrs. Waller’s room and notify her that they want to discharge her tomorrow and explore any concerns she may have. There are two buzzer questions at 6 minutes that ask about (1) next steps for the patient and (2) the factors contributing to this patient safety challenge.

**The SP.** The SP is given several things she ‘must say/ask’ including that she is not ready to go, she was told by the physiotherapist she wouldn’t be ready to go home before next week, she doesn’t understand who makes these decisions, she questions why she was told she’d stay another week, she is afraid she can’t manage at home, etc.

**Competency Domains.** Four competency domains are assessed in this station. Each domain is listed in the table below along with specific things the assessor can ‘look for’ to help in arriving at a rating for each of these four domains.

| Competency Domains Assessed                                                                | “Look Fors” linked to each competency domain                                                                                                                                                                                |
|--------------------------------------------------------------------------------------------|-----------------------------------------------------------------------------------------------------------------------------------------------------------------------------------------------------------------------------|
| <ul style="list-style-type: none"><li>Communicate effectively for patient safety</li></ul> | <ul style="list-style-type: none"><li>Reassures patient they won’t go home unless safety is ensured</li></ul>                                                                                                               |
| <ul style="list-style-type: none"><li>Work in teams for patient safety</li></ul>           | <ul style="list-style-type: none"><li>Candidate listens attentively to patient’s concerns</li><li>Is respectful of team members’ divergent perspectives in conversation with patient (e.g. does not blame others)</li></ul> |
| <ul style="list-style-type: none"><li>Manage safety risks</li></ul>                        | <ul style="list-style-type: none"><li>Advocates for individual patient in conversation with assessor</li><li>States actions required to ensure safe discharge</li></ul>                                                     |
| <ul style="list-style-type: none"><li>Contribute to a culture of patient safety</li></ul>  | <ul style="list-style-type: none"><li>Explains system issues that put pressure on discharges</li></ul>                                                                                                                      |
